# Supplementary material for: Restorative Reproductive Medicine: An Emerging New Treatment Process and a Prerequisite to Assisted Reproductive Technology for Treatment of Infertility.
Source: Preprints.org preprint supplement (doi:10.20944/preprints202401.0624.v1), 2024-01-08
Supplement: Supplementary file 1 [file supplementary]

Agnes Toth, Linda O'Neill, Craig J. Turczynski

Phil C. C. Boyle- Dr Boyle is co-developer of the NeoFertility Cycle tracking App which is available for sale on the App store.

[illegible]
