# Supplementary material for: Restorative Reproductive Medicine: An Emerging New Treatment Process and a Prerequisite to Assisted Reproductive Technology for Treatment of Infertility.
Source: Preprints.org preprint supplement (doi:10.20944/preprints202401.0624.v1), 2024-01-08
Supplement: Supplementary file 4 [file supplementary]

The authors whose names are listed immediately below certify that they have NO conflicts of interest to declare:

Agnes Toth, Linda O'Neill, Craig J. Turczynski

*The authors whose names are listed immediately below report the following conflicts of interest related to the work under consideration:*

Phil C. C. Boyle- Dr Boyle is co-developer of the NeoFertility Cycle tracking App which is available for sale on the App store.

This statement is signed by all the authors to indicate agreement that the above information is true and correct (a photocopy of this form may be used if there are more than 10 authors):

[illegible]
